# Supplementary material for: Promoting Heme and Phycocyanin Biosynthesis in Synechocystis sp. PCC 6803 by Overexpression of Porphyrin Pathway Genes with Genetic Engineering
Source: MDPI journal article supplement (doi:10.3390/md21070403), 2023-07-13
Supplement: s1 [file s1]

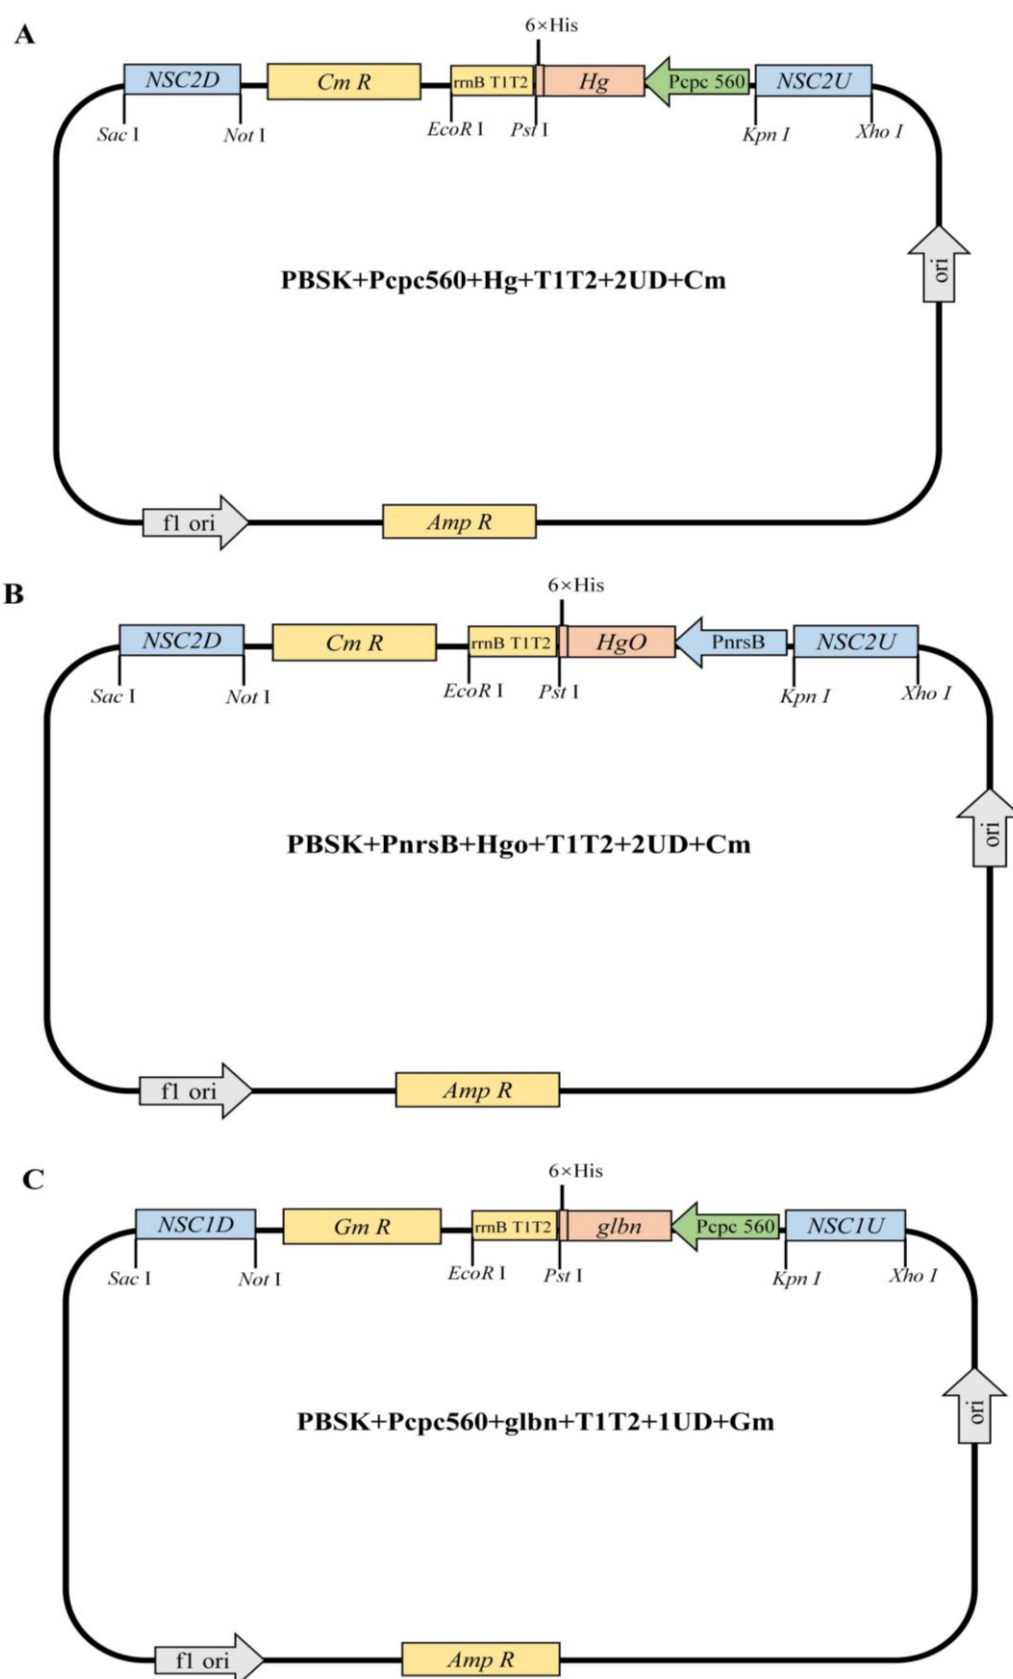

**Figure S1.** Gene expression vector constructions. The nsc1u/nsc1d and nsc2u/nsc2d are the upstream/downstream homologous arms of the expression vectors. CmR, Gm, and AmpR are the chloramphenicol, gentamicin, and ampicillin resistance expression cassettes, respectively. RrnB T1T2 is

the terminator, Pcp560 is the promoter, and pnr5B is the inducible promoter. The expression vector of Figure A is used to insert PCC 6803 endogenous genes (i.e., *hemA*, *hemB*, *hemC*, *hemE*, *hemF*, *hemH*, *hemJ*, *hemL*, and *hemN*) and PCC 7942 genes (i.e., *hemA*, *hemB*, *hemC*, *hemE*, *hemF*, *hemH*, *hemJ*, and *hemL*) at the position of Hg, respectively. Genes of PCC 6803 and PCC 7942 origins (*hemD* and *gltx*) are inserted at the position of Hgo, respectively, using the expression vector in Figure B. Gene *glbn* encodes hemoglobin in PCC 6803.

**Table S1.** The measured amount in the Figures 5–8; the length of the expected DNA fragments in Figure 2.

|         | Figure 5:<br>Heme content<br>(ug/g) | Figure 6:<br>Chlorophyll a<br>content (ug/ml) | Figure 7:<br>Carotenoid<br>Content<br>(ug/ml) | Figure 8:<br>Phycocyanin<br>content (ug/ml) | Figure 2:<br>length of<br>DNA fragments<br>(bp) |
|---------|-------------------------------------|-----------------------------------------------|-----------------------------------------------|---------------------------------------------|-------------------------------------------------|
| WT      | 22.64                               | 35.28                                         | 13.71                                         | 2.89                                        | 2329                                            |
| g-An    | 4.51                                | 34.70                                         | 13.31                                         | 2.72                                        | 5159                                            |
| g-Bn    | 3.48                                | 29.63                                         | 11.10                                         | 1.72                                        | 4859                                            |
| g-Cn    | 31.51                               | 32.62                                         | 12.41                                         | 1.82                                        | 4838                                            |
| g-Dn    | 6.30                                | 32.29                                         | 12.17                                         | 3.94                                        | 4992                                            |
| g-En    | 6.99                                | 34.09                                         | 13.14                                         | 1.49                                        | 4928                                            |
| g-Fn    | 31.09                               | 32.45                                         | 12.37                                         | 2.25                                        | 4898                                            |
| g-Hn    | 31.53                               | 23.51                                         | 11.92                                         | 1.98                                        | 4981                                            |
| g-Jn    | 8.73                                | 28.77                                         | 10.64                                         | 1.96                                        | 4399                                            |
| g-Ln    | 5.50                                | 34.12                                         | 13.02                                         | 2.64                                        | 5119                                            |
| g-Nn    | 5.52                                | 32.72                                         | 12.38                                         | 1.93                                        | 5218                                            |
| g-gltxn | 5.92                                | 30.18                                         | 11.26                                         | 7.55                                        | 4627                                            |
| g-glbn  | 56.65                               | 32.25                                         | 12.12                                         | 1.86                                        | 4472                                            |
| WT      | 22.64                               | 35.28                                         | 13.71                                         | 2.89                                        | 2329                                            |
| g-Af    | 7.96                                | 30.48                                         | 11.28                                         | 2.49                                        | 5128                                            |
| g-Bf    | 10.23                               | 31.95                                         | 12.01                                         | 1.61                                        | 4792                                            |
| g-Cf    | 7.55                                | 32.46                                         | 12.26                                         | 1.53                                        | 4774                                            |
| g-Df    | 3.05                                | 34.50                                         | 13.26                                         | 1.92                                        | 4180                                            |
| g-Ef    | 5.52                                | 35.36                                         | 13.75                                         | 1.89                                        | 4876                                            |
| g-Ff    | 5.03                                | 31.99                                         | 11.99                                         | 13.16                                       | 4765                                            |
| g-Hf    | 5.00                                | 32.28                                         | 12.12                                         | 2.12                                        | 4975                                            |
| g-Jf    | 3.93                                | 34.83                                         | 13.48                                         | 1.75                                        | 4423                                            |
| g-Lf    | 3.74                                | 34.28                                         | 13.17                                         | 3.46                                        | 5173                                            |
| g-gltxf | 6.90                                | 33.11                                         | 12.58                                         | 4.38                                        | 4821                                            |

**Table S2.** The readed OD<sub>730</sub> of the Figure 4.

| Days/Strains | 0     | 2     | 4     | 6     | 8     | 10    | 12    | 14    |
|--------------|-------|-------|-------|-------|-------|-------|-------|-------|
| g-An         | 0.005 | 0.021 | 0.076 | 0.154 | 0.203 | 0.302 | 0.374 | 0.445 |
| g-Bn         | 0.005 | 0.032 | 0.087 | 0.156 | 0.252 | 0.406 | 0.451 | 0.542 |
| g-Cn         | 0.005 | 0.020 | 0.087 | 0.158 | 0.232 | 0.318 | 0.405 | 0.444 |
| g-Dn         | 0.005 | 0.012 | 0.012 | 0.011 | 0.011 | 0.007 | 0.008 | 0.009 |
| g-En         | 0.005 | 0.014 | 0.042 | 0.104 | 0.154 | 0.224 | 0.344 | 0.392 |
| g-Fn         | 0.005 | 0.027 | 0.048 | 0.071 | 0.085 | 0.113 | 0.135 | 0.152 |
| g-Hn         | 0.005 | 0.029 | 0.067 | 0.115 | 0.183 | 0.234 | 0.325 | 0.382 |
| g-Ln         | 0.005 | 0.019 | 0.071 | 0.118 | 0.227 | 0.282 | 0.361 | 0.471 |
| g-Jn         | 0.005 | 0.024 | 0.090 | 0.144 | 0.212 | 0.341 | 0.406 | 0.497 |
| g-Nn         | 0.005 | 0.026 | 0.058 | 0.123 | 0.204 | 0.301 | 0.396 | 0.487 |
| g-gln        | 0.005 | 0.022 | 0.039 | 0.079 | 0.133 | 0.129 | 0.224 | 0.249 |
| g-gltn       | 0.005 | 0.013 | 0.014 | 0.011 | 0.011 | 0.010 | 0.009 | 0.010 |
| WT           | 0.005 | 0.028 | 0.093 | 0.178 | 0.292 | 0.385 | 0.474 | 0.528 |
| g-Af         | 0.005 | 0.018 | 0.079 | 0.126 | 0.217 | 0.325 | 0.392 | 0.492 |
| g-Bf         | 0.005 | 0.023 | 0.096 | 0.174 | 0.304 | 0.517 | 0.525 | 0.631 |
| g-Cf         | 0.005 | 0.029 | 0.073 | 0.176 | 0.203 | 0.318 | 0.409 | 0.499 |
| g-Df         | 0.005 | 0.008 | 0.009 | 0.012 | 0.006 | 0.007 | 0.006 | 0.005 |
| g-Ef         | 0.005 | 0.017 | 0.063 | 0.127 | 0.214 | 0.428 | 0.426 | 0.493 |
| g-Ff         | 0.005 | 0.047 | 0.076 | 0.144 | 0.190 | 0.331 | 0.383 | 0.540 |
| g-Hf         | 0.005 | 0.019 | 0.081 | 0.132 | 0.212 | 0.316 | 0.373 | 0.425 |
| g-Jf         | 0.005 | 0.028 | 0.071 | 0.149 | 0.246 | 0.371 | 0.428 | 0.471 |
| g-Lf         | 0.005 | 0.024 | 0.074 | 0.138 | 0.204 | 0.306 | 0.419 | 0.597 |
| g-gltnf      | 0.005 | 0.008 | 0.006 | 0.006 | 0.006 | 0.006 | 0.006 | 0.005 |

**Table S3.** Primers and their sequences used for PCR in this study. Letters “F” and “R” present the forward and reverse primers, respectively. Sequences of the homologous arms used in homologous recombination are indicated in lowercase letters.

| Primer    | Primer sequence (5'→3')            |
|-----------|------------------------------------|
| Pcpc560-F | gatgtcgacACCTGTAGAGAAGAGTCCCT      |
| Pcpc560-R | TGAATTAATCTCCTACTTGAC              |
| T1T2-F    | gatgaattcCTGTTTTGGCGGATGAGAGAA     |
| T1T2-R    | gatctgcagAAGAGTTTGTAGAAACGCAAAAAGG |
| Pnrbs-F   | TTCCACCAGCAAAATTCGCATC             |
| Pnrbs-R   | ACCACCTCAAATTGGGAAT                |
| NSC1U-F   | gatggtaccTTAACAGCAGAAAAAACCGTTGC   |
| NSC1U-R   | gatctcgagTTCTCCCATGTTGAAAAAGTCCC   |
| NSC1D-F   | gatgcggccgcTTAACAATTTGCCATGGGCA    |
| NSC1D-R   | gatgagctcTTGTCTCCTTGGTTGAAATTTATGG |
| NSC2U-F   | gatggtaccGCGATATATTGGTGAAGCAATTCC  |

|            |                                                        |
|------------|--------------------------------------------------------|
| NSC2U-R    | gatctcgagCTGTATGGAATCAAATCGATAGTTTCC                   |
| NSC2D-F    | gatcgggccgcAATTCCTTGACTAGGGCTAAAAATAGG                 |
| NSC2D-R    | gatgagctcTAAATTACCCTGGCAGGAATGG                        |
| Cm-F       | <u>gatggatcc</u> TGATCGGCACGTAAGAGGTTC                 |
| Cm-R       | gatggatccAATAGACATAAGCGGCTATTTAACGA                    |
| Gm-F       | <u>gatggatcc</u> TCACCATTTGGACAAAACATCAG               |
| Gm-R       | <u>gatggatcc</u> AAACGCAAAAGAAAATGCCG                  |
| Hema-syn-F | AGTCAAGTAGGAGATTAATTCAATGTTCTGCCATTCCGACTACA           |
| Hema-syn-R | gatgaattcCTAATGATGATGATGATGATGACCGAATTGTTCTTCCACTTCC   |
| Hemb-syn-F | AGTCAAGTAGGAGATTAATTCAATGTTTCCACCATCCGTCC              |
| Hemb-syn-R | gatgaattcCTAATGATGATGATGATGATGGTCCTGTAGCCAGCGGGC       |
| Hemc-syn-F | AGTCAAGTAGGAGATTAATTCAATGACTGTTTCGACCTCTGCTCC          |
| Hemc-syn-R | gatgaattcTTAATGATGATGATGATGATGTCCCCGGCCAGCTTC          |
| Hemd-syn-F | CCCAATTTGAGGTGGTATGGCTGAAAACTACCTCACCCAC               |
| Hemd-syn-R | TAATGATGATGATGATGATGCGGATTTTGGTAAACATAATTAGTAATG       |
| Heme-syn-F | AGTCAAGTAGGAGATTAATTCAATGACAGAAGCAAATGATTTGCC          |
| Heme-syn-R | gatgaattcTTAATGATGATGATGATGATGCAGTAATTGATCCACTTGCTTAGC |
| Hemf-syn-F | AGTCAAGTAGGAGATTAATTCAATGACCGTCTCTCCCACAACC            |
| Hemf-syn-R | gatgaattcCTAATGATGATGATGATGATGACTATTAACCCAGTCCTGGGG    |
| Hemh-syn-F | AGTCAAGTAGGAGATTAATTCAATGGGTCGTGTTGGGGTCTT             |
| Hemh-syn-R | gatgaattcCTAATGATGATGATGATGATGAAGCAAGCCGACAAAATGC      |
| Hemj-syn-F | AGTCAAGTAGGAGATTAATTCAATGGCCTACTACTGGTTTAAAGCC         |
| Hemj-syn-R | gatgaattcCTAATGATGATGATGATGATGATTCTGAGCAGAAGCCGCT      |
| Heml-syn-F | AGTCAAGTAGGAGATTAATTCATTGGTTAACGCAACCCCTTTT            |
| Heml-syn-R | gatgaattcTCAATGATGATGATGATGATGGAGAGTAGCAAATACTTCCTTAGC |
| Hemn-syn-F | AGTCAAGTAGGAGATTAATTCAATGACCACCACATTTCTACTGTTG         |
| Hemn-syn-R | gatgaattcTTAATGATGATGATGATGATGAATTGCCCCGAGAAAACATCT    |
| gltx-syn-F | TTCCCAATTTGAGGTGGTGTGACTGTCCGTGTCCGCATTGC              |
| gltx-syn-R | TAATGATGATGATGATGATGTTACGCGGCGATCGCCTG                 |
| Glnb-syn-F | AGTCAAGTAGGAGATTAATTCAATGTCAACTTTGTATGAAAAATTAGGTG     |
| Glnb-syn-R | gatgaattcTCAATGATGATGATGATGATGCTGATTAAGCACGTCCCCG      |
| Hema-syf-F | tcaagtaggagattaattcaATGCATCTCGCAGTTGTCCG               |
| Hema-syf-R | taatgatgatgatgatgGCTACTCAACTGTCCTTGTGGATCG             |
| Hemb-syf-F | tcaagtaggagattaattcaATGTTCCCCACGCATCGTC                |
| Hemb-syf-R | taatgatgatgatgatgGGCGAGCCAGCGAGCTGC                    |
| Hemc-syf-F | tcaagtaggagattaattcaATGGTCTCCAGCCCTGCC                 |
| Hemc-syf-R | taatgatgatgatgatgAGCTTCAGGGCGAACAGTCG                  |
| Hemd-syf-F | TCCCAATTTGAGGTGGTATGGCTGAGCAGCCGCTGATCGGT              |
| Hemd-syf-R | TAATGATGATGATGATGATGCGTGTTTGGCGCGCCCA                  |
| Heme-syf-F | tcaagtaggagattaattcaATGGTCGCGTCGTCTTCGC                |

---

|            |                                                    |
|------------|----------------------------------------------------|
| Heme-syf-R | taatgatgatgatgatgGTGACTCGCTGCCAAGAGTTG             |
| Hemf-syf-F | tcaagtaggagattaattcaATGCAGACCCTGCAAGACGA           |
| Hemf-syf-R | taatgatgatgatgatgGGCGGTCGGCCAGTTGAC                |
| Hemh-syf-F | tcaagtaggagattaattcaATGGGGCGCGTCGGCGTC             |
| Hemh-syf-R | taatgatgatgatgatgGAGCAACCCCAAGGCATGC               |
| Hemj-syf-F | tcaagtaggagattaattcaTTGCGCTCTCTTGAGGCCG            |
| Hemj-syf-R | taatgatgatgatgatgGGACTGGGTGGGCGCTGC                |
| Heml-syf-F | tcaagtaggagattaattcaATGAGGAGGCTGTCAGCATCG          |
| Heml-syf-R | taatgatgatgatgatgCAGCGCACTCATCACCGTACG             |
| gltx-syf-F | TCCCAATTTGAGGTGGTGTGTCAGTTCGCGTTCGCATTGCTC         |
| gltx-syf-R | TAATGATGATGATGATGATGGCCCTGAGCCGCCGCGAT             |
| 2udPT-F    | CATCATCATCATCATCATTAGgaattcCTGTTTTGGCGGATGAGAGAAGA |
| 2udPT-R    | TGAATTAATCTCCTACTTGACTTTATGAGT                     |
| 2u-noP-F   | CTGTATGGAATCAAATCGATAGTTTC                         |
| IP-F       | ATCGATTTGATTCCATACAGTTCCACCAGCAAAATTCGCA           |
| IP-gn-R    | CGGACAGTCACACCACCTCAAATTGGGAATTTGTCCAAGAT          |
| IP-dn-R    | GTTTTTCAGCCATACCACCTCAAATTGGGAATTTGTCCAAGAT        |
| IP-gf-R    | GCGAACTGACACACCACCTCAAATTGGGAATTTGTCCAAGAT         |
| IP-df-R    | CTGCTCAGCCATACCACCTCAAATTGGGAATTTGTCCAAGAT         |

---

**Table S4.** Gene overexpression vector ligation and transformation system in *Synechocystis* sp. PCC 6803. The system was configured and ligated with T4 ligase at 16 °C for 12 h (Supplementary Table 4). The ligation product was transformed into *E. coli* as follows. After a brief incubation in ice, the mixture of *E. coli* receptor cells and DNA was placed at 42 °C for 45 sec (heat excitation) and then placed back in ice. The LB medium was added and the transformed cells were incubated at 37 °C for 30 min with agitation. The bacterial solution was applied to LB solid plates with relevant resistance using a pre-sterilized applicator. Single clones on the screening plate were picked for colony PCR to screen positive transformants. The positive transformants were sequenced (Tsingke, Beijing, China) and then expanded to culture with the plasmids extracted using the Plasmid Extraction Kit (Vazyme, Nanjing, China; DC201-01).

| Name                      | Volume      |
|---------------------------|-------------|
| Carrier enzyme section    | 1 µL        |
| Gene fragments            | 7 µL        |
| T4 DNA ligase             | 1 µL        |
| 10 × T4 DNA ligase Buffer | 2 µL        |
| ddH <sub>2</sub> O        | Up to 20 µL |

**Table S5.** Primers and their sequences used for qRT-PCR in this study.

| Primer     | Primer sequence (5'→3')   |
|------------|---------------------------|
| Gltx-f-Q-F | GCACCGAAGCCGAACTGGAA      |
| Gltx-f-Q-R | CGTCATCAATGCGGAAGCGAATC   |
| Gltx-Q-F   | TGGTGTGGCAGGGCAGTGAT      |
| Gltx-Q-R   | TTAGCGGTATTGGCAATGTGGTCTT |
| A-Q-F      | AAGGAGCCACGGACATCACCAT    |
| A-Q-R      | ACAGCCAGTCAAATTCTCGCAGTT  |
| B-Q-F      | CATGCCTGGAGTGTACCAACTGTC  |
| B-Q-R      | TTCACCGCTTCCGTCGCCTT      |
| C-Q-F      | GCCAAGTGCCTATCGGTGTTAATAC |
| C-Q-R      | CGCTAAGATTTCCGCTAGGATTTC  |
| D-Q-F      | CGACCAAGCGAGCCAGTTTACC    |
| D-Q-R      | GCGGAAGTCAGAATTAGCCAGTCAA |
| E-Q-F      | ACCTTTGCCCTGCCCTACCA      |
| E-Q-R      | TCCACCGTCCAGTCCACACT      |
| F-Q-F      | GGGCAAATCCCTACCTCCTTCAAT  |
| F-Q-R      | TCCACCTCCGAACCACCACA      |
| glbn-Q-F   | TGGAACCACCGCTGTCGATCTA    |
| glbn-Q-R   | TTTATCCGTACCGCCAAAGGCATAG |
| H-Q-F      | GGGTGTTGGAGGAAATGTGGCATA  |
| H-Q-R      | AAATATGGGCTTGGTCTGGATTGGG |

---

|             |                           |
|-------------|---------------------------|
| J-Q-F       | TTGCTCGTGGTGATTGTCCTACTG  |
| J-Q-R       | TGCTGTTCCGTTAATAGTGCTTGGT |
| L-Q-F       | GCGGTTCCATCAGTGCCATGTT    |
| L-Q-R       | TGTTCTTGGGTGTGGGCTAGGG    |
| N-Q-F       | AATTCGTCGCACTGTAATCAAGGA  |
| N-Q-R       | AACCATCCGCTTCCAGGACATC    |
| slr0116-Q-F | GTGGAGTAAGTGCGGCTATTGC    |
| ho1-Q-F     | CCATCCCATCCTCAGCCACAT     |
| ho2-Q-F     | CTTTACGCCAACATCGGGACAA    |
| cysG-Q-F    | TGGCATTGAGGTGGAAGTGGTA    |
| chlM-Q-F    | GGCATTGGTCTATGGCAGTGAT    |
| slr0116-Q-R | TGACATTGCTGGGACGGATGAA    |
| ho1-Q-R     | TTCACTTCTTGCCGCCAGTTG     |
| ho2-Q-R     | GCACAGGGAGTAGGCTGGATTA    |
| cysG-Q-R    | AGGTGACGGAGGAAGTGTAAAGC   |
| chlM-Q-R    | GCCTCCTCCGTTGGATAGTGAA    |
| rnpB-F      | TTTAGAAAACAGCAACCAGT      |
| rnpB-R      | GGCAGGAAAAAGACCAACCT      |

---

**Table S6.** Molecular weights of target proteins overexpressed in the mutant strains of *Synechocystis* sp. PCC 6803 derived from either strain PCC 6803 or *Synechococcus elongatus* PCC 7942.

| Mutant strain | Protein | Molecular weight (kDa) | Source   |
|---------------|---------|------------------------|----------|
| g-An          | HemA    | 48.3                   | PCC 6803 |
| g-Bn          | HemB    | 37                     | PCC 6803 |
| g-Cn          | HemC    | 35.7                   | PCC 6803 |
| g-Dn          | HemD    | 59.5                   | PCC 6803 |
| g-En          | HemE    | 40                     | PCC 6803 |
| g-Fn          | HemF    | 39.7                   | PCC 6803 |
| g-Hn          | HemH    | 44.7                   | PCC 6803 |
| g-Jn          | HemJ    | 24.8                   | PCC 6803 |
| g-Ln          | HemL    | 46.7                   | PCC 6803 |
| g-Nn          | HemN    | 54                     | PCC 6803 |
| g-glbN        | GlbN    | 14.7                   | PCC 6803 |
| g-gltxn       | Gltx    | 54.8                   | PCC 6803 |
| g-Af          | HemA    | 49.2                   | PCC 7942 |
| g-Bf          | HemB    | 26.4                   | PCC 7942 |
| g-Cf          | HemC    | 35.6                   | PCC 7942 |
| g-Df          | HemD    | 29.3                   | PCC 7942 |
| g-Ef          | HemE    | 40.1                   | PCC 7942 |
| g-Ff          | HemF    | 37.1                   | PCC 7942 |
| g-Hf          | HemH    | 45.1                   | PCC 7942 |
| g-Jf          | HemJ    | 24                     | PCC 7942 |
| g-Lf          | HemL    | 46.9                   | PCC 7942 |
| g-gltxf       | Gltx    | 54                     | PCC 7942 |
